# Supplementary material
Source: PubMed Central journal article supplement (PMC6701475)

## SUPPLEMENTAL MATERIALS

**Table E1.** CPT procedural and ICD-9 surgery codes

| <b>CABG</b>                                                                                          | <b>PCI</b>                                                                                                              |
|------------------------------------------------------------------------------------------------------|-------------------------------------------------------------------------------------------------------------------------|
| <b>CPT procedure codes for CABG</b>                                                                  | <b>CPT procedure codes for PCI</b>                                                                                      |
| 33510 - Coronary artery bypass, vein only; single coronary venous graft                              | 92973 - Coronary Therapeutic Services and Procedures                                                                    |
| 33511 - Coronary artery bypass, vein only; 2 coronary venous grafts                                  | 92980 – Stenting, (92981 - Stenting, additional vessel)                                                                 |
| 33512 - Coronary artery bypass, vein only; 3 coronary venous graft                                   | 92982 – Angioplasty (92984 - Angioplasty, additional vessel)                                                            |
| 33513 - Coronary artery bypass, vein only; 4 coronary venous grafts                                  | 92985 - Percutaneous transluminal coronary atherectomy                                                                  |
| 33514 - Coronary artery bypass, vein only; 5 coronary venous grafts                                  | 92995 – Atherectomy (92996 - Atherectomy, additional vessel)                                                            |
| 33516 - Coronary artery bypass, vein only; 6 or more coronary venous graft                           | 92920 - Balloon angioplasty                                                                                             |
| 33517 - Coronary artery bypass, using venous graft(s) and arterial graft(s); single vein graft       | 92924 - Atherectomy                                                                                                     |
| 33518 - Coronary artery bypass, using venous graft(s) and arterial graft(s); 2 venous grafts         | 92928 - Stenting                                                                                                        |
| 33519 - Coronary artery bypass, using venous graft(s) and arterial graft(s); 3 venous grafts         | 92933 - Atherectomy with stenting                                                                                       |
| 33521 - Coronary artery bypass, using venous graft(s) and arterial graft(s); 4 venous grafts         | 92941 - PCI of acute total/subtotal lesion                                                                              |
| 33522 - Coronary artery bypass, using venous graft(s) and arterial graft(s); 5 venous grafts         | 92943 - PCI of chronic total occlusion                                                                                  |
| 33523 - Coronary artery bypass, using venous graft(s) and arterial graft(s); 6 or more venous grafts | <b>ICD-9-CM surgery codes for PCI</b>                                                                                   |
| 33530 - Combined Arterial-Venous Grafting for Coronary Bypass                                        | 00.66 - Percutaneous transluminal coronary angioplasty or coronary atherectomy                                          |
| 33533 - Coronary artery bypass, using arterial graft(s); single arterial graft                       | 36.0 - Removal of Coronary Artery Obstruction and Insertion of Stent(s)                                                 |
| 33534 - Coronary artery bypass, using arterial graft(s); 2 coronary arterial graft                   | 36.01 - Single vessel percutaneous transluminal coronary angioplasty or coronary atherectomy without thrombolytic agent |

|                                                                                            |                                                                                                                    |
|--------------------------------------------------------------------------------------------|--------------------------------------------------------------------------------------------------------------------|
| 33535 - Coronary artery bypass, using arterial graft(s); 3 coronary arterial graft         | 36.02 Single vessel percutaneous transluminal coronary angioplasty or coronary atherectomy with thrombolytic agent |
| 33536 - Coronary artery bypass, using arterial graft(s); 4 or more coronary arterial graft | 36.05 Multiple vessel percutaneous transluminal coronary angioplasty or coronary atherectomy                       |
| 33572 - Coronary Endarterectomy Procedures                                                 | 36.06 - Insertion of Non-Drug-Eluting Coronary Artery Stent(s)                                                     |
| <b>ICD-9-CM surgery codes for CABG</b>                                                     | 36.07 - Insertion of Drug-Eluting Coronary Artery Stent(s)                                                         |
| 36.10 - Aortocoronary Bypass for Heart Revascularization, Not Otherwise Specified          | 36.09 - Other Removal of Coronary Artery Obstruction                                                               |
| 36.11 - Aortocoronary Bypass of One Coronary Artery                                        | 00.40 - Procedure on single vessel (secondary code)                                                                |
| 36.12 - Aortocoronary Bypass of Two Coronary Arteries                                      | 00.41 - Procedure on two vessels (secondary code)                                                                  |
| 36.13 - Aortocoronary Bypass of Three Coronary Arteries                                    | 00.42 - Procedure on three vessels (secondary code)                                                                |
| 36.14 - Aortocoronary Bypass of Four or More Coronary Arteries                             | 00.43 - Procedure on four or more vessels (secondary code)                                                         |
| 36.15 - Single Internal Mammary-Coronary Artery Bypass                                     | 00.45 - Insertion of one vascular stent (secondary code)                                                           |
| 36.16 - Double Internal Mammary-Coronary Artery Bypass                                     | 00.46 - Insertion of two vascular stents (secondary code)                                                          |
| 36.17 - Abdominal-Coronary Artery Bypass                                                   | 00.47 - Insertion of three vascular stents (secondary code)                                                        |
| 36.19 - Other Bypass Anastomosis for Heart Revascularization                               | 00.48 - Insertion of four or more vascular stents (secondary code)                                                 |

Abbreviations: CABG, coronary artery bypass grafting; CPT, Current Procedural Terminology; ICD-9-CM, International Classification of Diseases 9th Revision Clinical Modification; PCI, percutaneous coronary interventions.

**Table E2.** Complete adjusted Cox proportional hazard models (STATA output) evaluating association between post-ESRD all-cause mortality and type of revascularization.

| <b>Model 1</b>    |                  |                   |                  |                 |                 |                             |
|-------------------|------------------|-------------------|------------------|-----------------|-----------------|-----------------------------|
| No. of subjects = | 964              |                   |                  | Number of obs = | 964             |                             |
| No. of failures = | 523              |                   |                  |                 |                 |                             |
| Time at risk =    | 2033.675565      |                   |                  |                 |                 |                             |
| Log likelihood =  | -3187.5586       |                   |                  | LR chi2(2) =    | 14.73           |                             |
|                   |                  |                   |                  | Prob > chi2 =   | 0.0006          |                             |
| -----             |                  |                   |                  |                 |                 |                             |
|                   | <b>_t</b>        | <b>Haz. Ratio</b> | <b>Std. Err.</b> | <b>z</b>        | <b>P&gt; z </b> | <b>[95% Conf. Interval]</b> |
| -----             |                  |                   |                  |                 |                 |                             |
|                   | CABG (PCI ref)   | .7414783          | .0662199         | -3.35           | 0.001           | .622414 .8833189            |
|                   | Time to ESRD     | 1.000146          | .0000805         | 1.81            | 0.070           | .999988 1.000303            |
| -----             |                  |                   |                  |                 |                 |                             |
| <b>Model 2</b>    |                  |                   |                  |                 |                 |                             |
| No. of subjects = | 915              |                   |                  | Number of obs = | 915             |                             |
| No. of failures = | 498              |                   |                  |                 |                 |                             |
| Time at risk =    | 1911.227926      |                   |                  |                 |                 |                             |
| Log likelihood =  | -2977.8877       |                   |                  | LR chi2(10) =   | 68.99           |                             |
|                   |                  |                   |                  | Prob > chi2 =   | 0.0000          |                             |
| -----             |                  |                   |                  |                 |                 |                             |
|                   | <b>_t</b>        | <b>Haz. Ratio</b> | <b>Std. Err.</b> | <b>z</b>        | <b>P&gt; z </b> | <b>[95% Conf. Interval]</b> |
| -----             |                  |                   |                  |                 |                 |                             |
|                   | CABG (PCI ref)   | .7160332          | .0664397         | -3.60           | 0.000           | .5969685 .8588453           |
|                   | Time to ESRD     | 1.000261          | .0000837         | 3.12            | 0.002           | 1.000097 1.000425           |
|                   | Race_African-Am  | .5691123          | .071976          | -4.46           | 0.000           | .4441666 .7292057           |
|                   | Race_others      | .879551           | .3382598         | -0.33           | 0.739           | .4139081 1.869038           |
|                   | Sex_female       | .5704547          | .2877776         | -1.11           | 0.266           | .212234 1.533301            |
|                   | Age              | 1.028224          | .0059122         | 4.84            | 0.000           | 1.016702 1.039877           |
|                   | Marital_single   | 1.023306          | .1759549         | 0.13            | 0.893           | .730539 1.4334              |
|                   | Marital_divorced | 1.061564          | .1106945         | 0.57            | 0.567           | .8653407 1.302282           |
|                   | Marital_widowed  | 1.134877          | .1732279         | 0.83            | 0.407           | .8414359 1.530652           |
|                   | Income           | 1                 | 9.66e-07         | 0.28            | 0.779           | .9999984 1.000002           |
| -----             |                  |                   |                  |                 |                 |                             |
| <b>Model 3</b>    |                  |                   |                  |                 |                 |                             |



|                   |             |                 |        |
|-------------------|-------------|-----------------|--------|
| No. of subjects = | 893         | Number of obs = | 893    |
| No. of failures = | 481         |                 |        |
| Time at risk =    | 1874.759754 |                 |        |
| Log likelihood =  | -2825.7231  | LR chi2(46) =   | 147.76 |
|                   |             | Prob > chi2 =   | 0.0000 |

| _t                  | Haz. Ratio | Std. Err. | z     | P> z  | [95% Conf. Interval] |
|---------------------|------------|-----------|-------|-------|----------------------|
| CABG (PCI ref)      | .6375721   | .0684449  | -4.19 | 0.000 | .5165957 .7868788    |
| Time to ESRD        | 1.000158   | .0001038  | 1.52  | 0.128 | .9999544 1.000361    |
| Race_African-Am     | .5398305   | .0738526  | -4.51 | 0.000 | .4128641 .7058423    |
| Race_others         | .8428893   | .3590652  | -0.40 | 0.688 | .3657331 1.94257     |
| Sex_female          | .6984896   | .3606936  | -0.69 | 0.487 | .2538676 1.921819    |
| Age                 | 1.028686   | .0070715  | 4.11  | 0.000 | 1.014919 1.04264     |
| Marital_single      | 1.041356   | .1896596  | 0.22  | 0.824 | .7287392 1.488081    |
| Marital_divorced    | 1.021924   | .113965   | 0.19  | 0.846 | .8212821 1.271582    |
| Marital_widowed     | 1.122028   | .1792137  | 0.72  | 0.471 | .8204402 1.534476    |
| Income              | 1          | 1.00e-06  | 0.15  | 0.883 | .9999982 1.000002    |
| Myocardial Inf      | 1.143135   | .1256792  | 1.22  | 0.224 | .9215406 1.418015    |
| Cong Heart Fail     | 1.255467   | .1384223  | 2.06  | 0.039 | 1.011476 1.558315    |
| Perif vasc dis      | 1.166234   | .1194715  | 1.50  | 0.133 | .9540844 1.425557    |
| Cerebr vasc dis     | 1.08494    | .1158217  | 0.76  | 0.445 | .8801087 1.337441    |
| Dementia            | 1.461129   | .7796359  | 0.71  | 0.477 | .513453 4.157924     |
| Chron pulm dis      | 1.089397   | .1158518  | 0.81  | 0.421 | .8844335 1.341859    |
| Conn tissue dis     | .6902939   | .229029   | -1.12 | 0.264 | .3602619 1.322665    |
| Peptic ulcer dis    | .5653374   | .1518267  | -2.12 | 0.034 | .3339716 .9569868    |
| AIDS/HIV            | 2.065751   | 1.04883   | 1.43  | 0.153 | .7636655 5.587953    |
| Liver_disease       | 1.342649   | .1866441  | 2.12  | 0.034 | 1.022434 1.763151    |
| Malignancy          | 1.09896    | .2049967  | 0.51  | 0.613 | .762432 1.584026     |
| Anemia              | 1.384775   | .1892996  | 2.38  | 0.017 | 1.059301 1.810252    |
| Atrial fibrillation | .9964353   | .1144021  | -0.03 | 0.975 | .7956489 1.247891    |
| Depression          | 1.62185    | .2878718  | 2.72  | 0.006 | 1.145317 2.296654    |
| Hyperlipidemia      | .9891169   | .117943   | -0.09 | 0.927 | .7829783 1.249527    |
| Hypertension        | 1.376285   | .1765778  | 2.49  | 0.013 | 1.070284 1.769774    |
| Ischemic heart d    | .7186856   | .1218245  | -1.95 | 0.051 | .5155273 1.001904    |
| BMI                 | .9090606   | .1310846  | -0.66 | 0.508 | .6852537 1.205964    |
| eGFR                | .9807048   | .0087683  | -2.18 | 0.029 | .963669 .9980418     |
| Anticoagulants      | 1.008641   | .002508   | 3.46  | 0.001 | 1.003737 1.013568    |
| Thrombolytics       | .8590826   | .1024546  | -1.27 | 0.203 | .6800177 1.085299    |
| Aspirin             | 1.721869   | 1.060342  | 0.88  | 0.378 | .515018 5.756754     |
| Digitalis           | 1.011148   | .1285439  | 0.09  | 0.931 | .7881422 1.297255    |
| Betablockers        | 1.239423   | .2477217  | 1.07  | 0.283 | .8377054 1.833783    |
| Alpha-blockers      | .9981035   | .1675265  | -0.01 | 0.991 | .7182999 1.386901    |
| Ca_chan_blockers    | .8782665   | .0975522  | -1.17 | 0.243 | .7064482 1.091873    |
| Antianginals        | 1.056736   | .1109094  | 0.53  | 0.599 | .8602586 1.298088    |
| Statins             | 1.17349    | .1314483  | 1.43  | 0.153 | .9421759 1.461593    |
| Vasodilators        | .9825247   | .1409892  | -0.12 | 0.902 | .7416495 1.301632    |
| Thiazides           | 1.010731   | .1214586  | 0.09  | 0.929 | .7986329 1.279156    |
| Loop-diuretics      | .8384454   | .089459   | -1.65 | 0.099 | .6802284 1.033463    |
| K_sparing_diuret    | .8907888   | .1039961  | -0.99 | 0.322 | .7085986 1.119823    |
| RAAS_inh            | .8359263   | .1478496  | -1.01 | 0.311 | .5910397 1.182277    |
| Insulin             | .9424705   | .1135198  | -0.49 | 0.623 | .7442883 1.193423    |
| Treated_vessels     | 1.033784   | .1291894  | 0.27  | 0.790 | .8092025 1.320694    |
|                     | 1.036528   | .1065456  | 0.35  | 0.727 | .8473938 1.267876    |

**Table E3.** Association between post-ESRD all-cause mortality and type of revascularization (CABG vs PCI (reference)) using multivariable Cox proportional hazards model (final model 4 from original analysis) in a cohort of patients with revascularization performed up to two years and up to one year prior to the first dialysis.

| <b>Cohort years</b> | <b>Patients/Events</b> | <b>HR</b> | <b>95% CI</b> | <b>p-value</b> |
|---------------------|------------------------|-----------|---------------|----------------|
| <b>Two years</b>    | 421/217                | 0.46      | 0.31–0.69     | p<0.001        |
| <b>One year</b>     | 272/133                | 0.42      | 0.25–0.68     | p=0.001        |

**Table E4.** Association between post-ESRD all-cause mortality and type of revascularization (CABG vs PCI (reference)) using multivariable Cox proportional hazards model (final model 4 from original analysis) in a cohort of patients with multi-vessel intervention.

| <b>Cohort type</b>  | <b>Patients/Events</b> | <b>HR</b> | <b>95% CI</b> | <b>p-value</b> |
|---------------------|------------------------|-----------|---------------|----------------|
| <b>Multi-vessel</b> | 571/302                | 0.53      | 0.37–0.75     | p<0.001        |

**Table E5.** Association between post-ESRD all-cause mortality and type of revascularization (CABG vs PCI (reference)) using multivariable Cox proportional regression analysis in a propensity score-matched cohort of patients with multi-vessel intervention.

| <b>PSM 1:1</b>      | <b>Patients/Events</b> | <b>HR</b> | <b>95% CI</b> | <b>p-value</b> |
|---------------------|------------------------|-----------|---------------|----------------|
| <b>Multi-vessel</b> | 208/115                | 0.64      | 0.44–0.93     | p=0.018        |



**Figure E1.** Probability of Survival in the CABG and PCI groups with multi-vessel intervention after propensity score matching

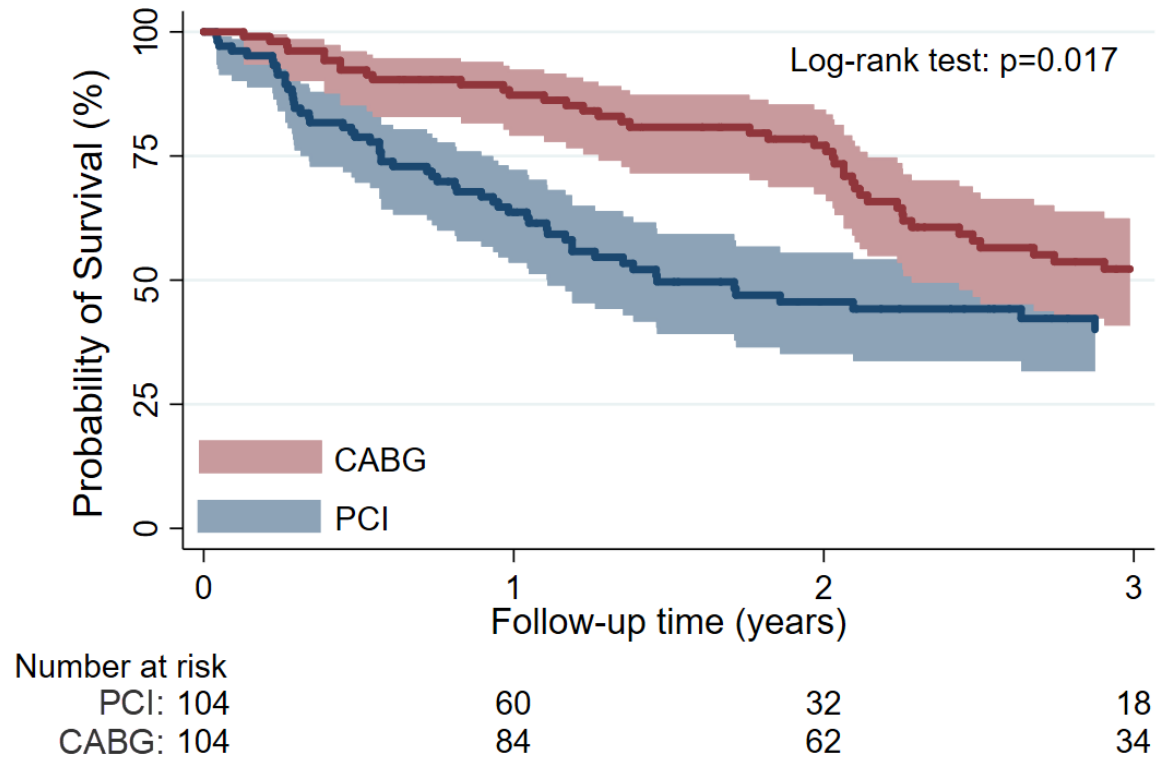

Supplement: NIHMS1514501-supplement-1.pdf [file NIHMS1514501-supplement-1.pdf]
